# Supplementary material for: Brief wide-field photostimuli evoke and modulate oscillatory reverberating activity in cortical networks
Source: PubMed Central journal article supplement (PMC4838830; doi:10.1038/srep24701), 2016-04-21
Supplement: srep24701-s1.pdf [file srep24701-s1.pdf]

## **Brief wide-field photostimuli evoke and modulate oscillatory reverberating activity in cortical networks**

**Short title: Photo-activated network responses in vitro**

Rocco Pulizzi<sup>1</sup>, Gabriele Musumeci<sup>1</sup>, Chris Van Den Haute<sup>2-3</sup>, Sebastiaan Van De Vijver<sup>1</sup>,  
Veerle Baekelandt<sup>2</sup>, Michele Giugliano<sup>1, 4-5</sup>

<sup>1</sup>*Theoretical Neurobiology & Neuroengineering, University of Antwerp, Antwerp, Belgium;*

<sup>2</sup>*Laboratory of Neurobiology and Gene Therapy, Katholieke Universiteit Leuven, Leuven, Belgium;*

<sup>3</sup>*Leuven Viral Vector Core, Katholieke Universiteit Leuven, Leuven, Belgium*

<sup>4</sup>*Department of Computer Science, University of Sheffield, S1 4DP Sheffield, UK*

<sup>5</sup>*Laboratory of Neural Microcircuitry, Brain Mind Institute, EPFL, CH-1015 Lausanne, Switzerland*

### **Supplementary Information**

- **Supplementary Figure S1**
  
- **Supplementary Figure S2**

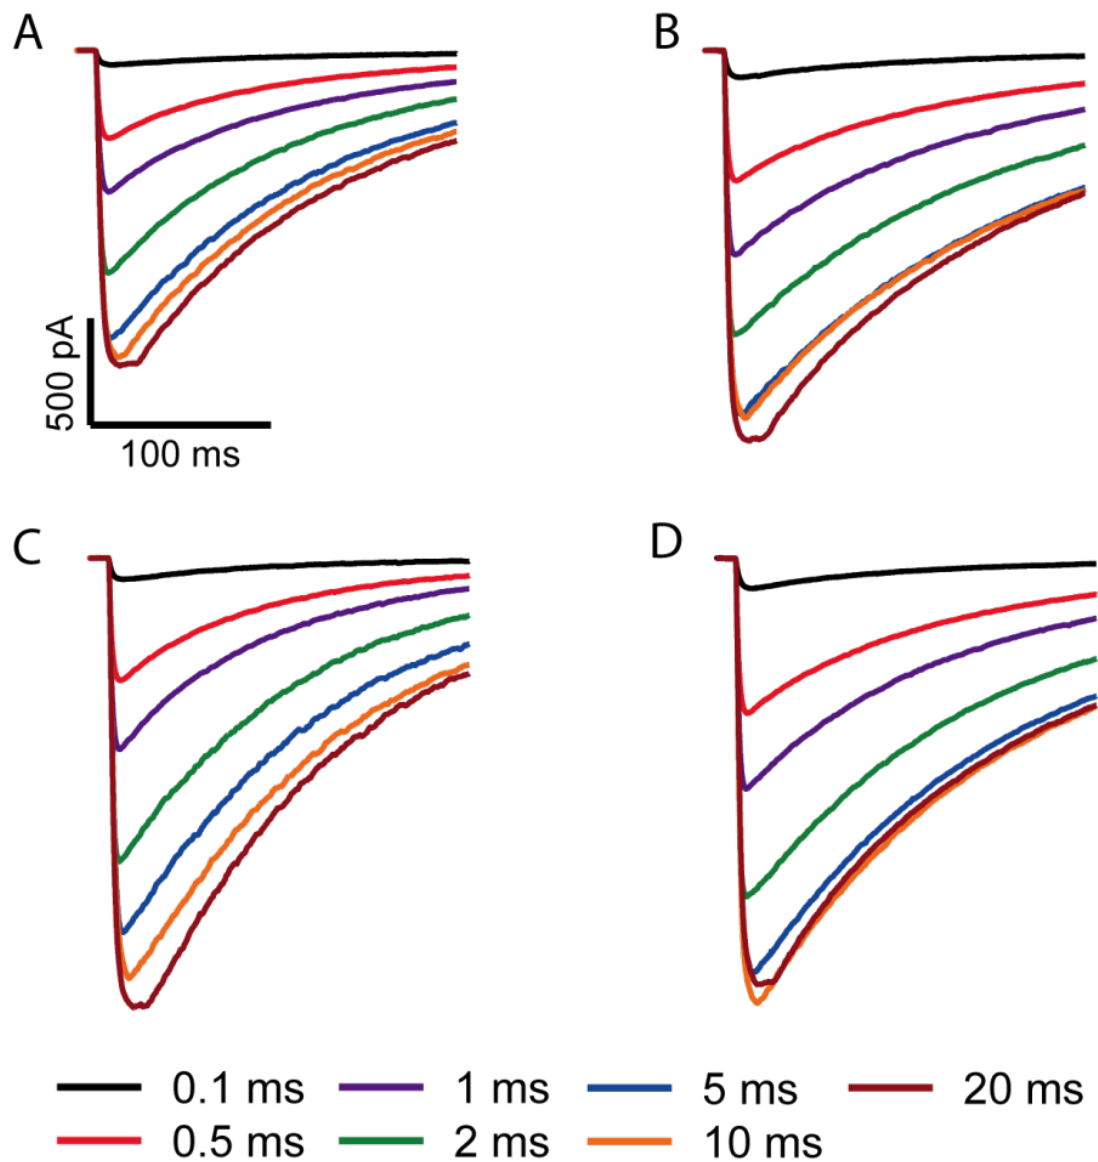

**Figure S1. ChR2-LCTC current dynamics.** Voltage-clamp experiments were performed under TTX in neurons expressing ChR2-LCTC, in order to explore the inward current dynamics. Varying the stimulus duration modulates the peak current amplitude in four representative neurons (A-D).

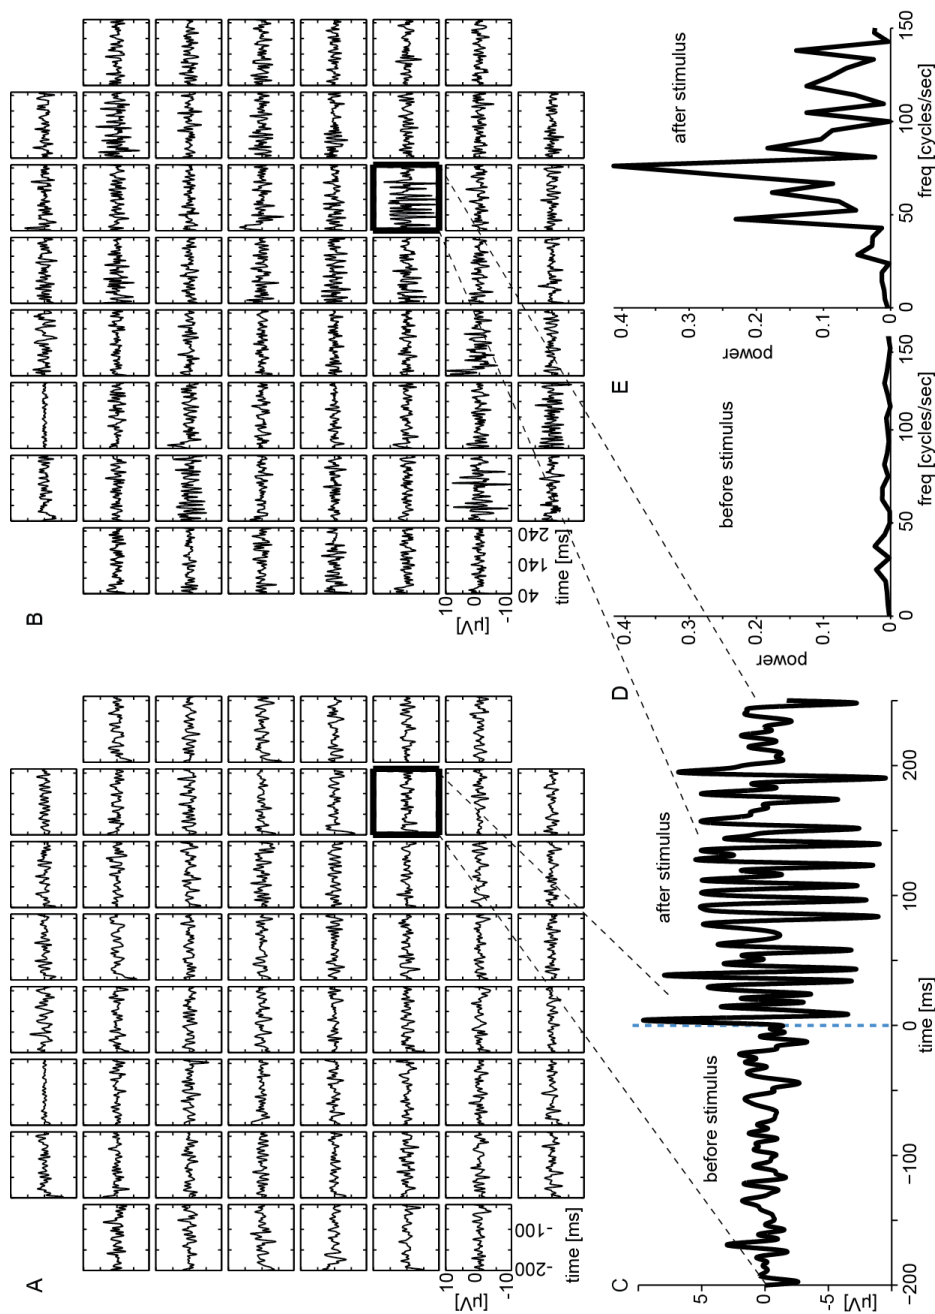

**Figure S2. Light-evoked oscillatory activity is also reflected in single-trial raw voltage traces.** Reminiscent of network rhythm signatures in local field potentials *in vivo* or in brain slices, the impact of brief (1msec) photoactivation was apparent also in single trials raw extracellular voltage recordings, low-pass filtered below 110 cycles/sec. For each MEA microelectrode, filtered voltage traces recorded ~200ms preceding (A) or following (B) the stimulus onset are displayed: the apparent transient increase in signal variance, recorded at most microelectrodes, correspond to reverberating network-wide spiking activity (Figs. 2A, 3). Estimating the power spectrum of a sample low-pass filtered raw trace (C-D) reveals light-induced oscillations in the same range as the spike PSTH (Fig. 3C), although with a much worst signal-to-noise ratio (Fig. 3C).
